# Supplementary material
Source: PubMed Central journal article supplement (PMC2656933)

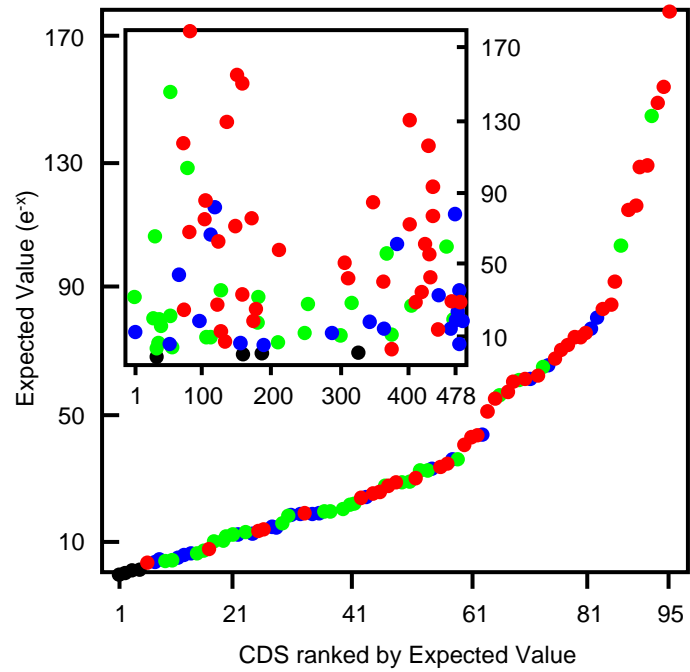

Supplementary  
Material Figure 1

Supplement: NIHMS2994-supplement-suppfig.pdf [file NIHMS2994-supplement-suppfig.pdf]
